# Supplementary material for: Nanoparticle display of prefusion coronavirus spike elicits S1-focused cross-reactive protection across divergent subgroups
Source: Research Square preprint supplement (doi:10.21203/rs.3.rs-2199814/v1), 2022-11-07
Supplement: Supplementary file 1 [file 43d454627eb8909919d2997f.docx]

**Supplementary Fig. 1: MERS-specific monoclonal antibody JC57-13 does not bind purified SARS-1_dn5.**

For further validation, ELISAs were performed on SARS-1_dn5 nanoparticles using monoclonal antibodies specific for SARS (S652-27), MERS (JC57-13), and negative control, influenza-HA (CR6261).

**Supplementary Fig. 2: Dose escalation.**

**a-c** Groups of N=10 C57BL/6 mice were immunized with 0.1, 1.0, or 10µg of SARS-1_S-2P or SARS-1_dn5 and bled for serology 3 weeks later. Sera were screened by ELISA for binding to SARS-1_S-2P, SARS-2_S-2P, or MERS_S-2P.

**a**

**b**

**c**

**a**

**b**

**c**

**Immunogen:**

**Binding**

**Neutralization**

**Antigen:**

**Immunogen:**

**Pseudovirus:**

**Correlation**

**d**

**e**

**f**

**g**

**h**

**i**

**Supplementary Fig. 3: Assembly of SARS-1_S-2P on dn5 elicits potent cross-neutralizing antibodies.**

**a-f** Groups of 5-10 female C57BL/6J mice from two independent, concatenated studies were immunized at weeks 0 and 3 with 10 µg of SARS-1_S-2P as a soluble trimer or displayed on dn5 particles with SAS adjuvant and bled at week 5 for serology. Control mice were immunized with H1_dn5. **a-c** Serum was screened for binding by ELISA to SARS-1_, SARS-2_, and MERS_S-2P. **d-f** Serum was then assessed for its capacity to neutralize SARS-1, SARS-2, and MERS pseudoviruses. **g-i** To plot the potency of neutralizing antibodies, correlation plots of binding (x-axis) to neutralization (y-axis) where the slope (neutralization/binding) indicates the ratio of neutralizing to binding antibody titers were generated. Boxes and horizontal bars denote the interquartile range (IQR) and medians, respectively. Whisker endpoints are equal to the minimum and maximum values. Statistical analysis was performed using non-parametric Kruskal-Wallis test with Dunn’s multiple comparisons. *P<0.05, ***P* < 0.01, *****P* < 0.0001.

**Depletion:**

**Antigen:**

**Supplementary Fig. 4: SARS-1_dn5 sera depleted with MERS-CoV spike domains binds to HKU1 spike.**

To elucidate cross-reactive domain specificity, SARS-1_dn5 sera was depleted with MERS_S-2P and its domains, S1, SS, and RBD then screened for residual binding to HKU1. Boxes and horizontal bars denote the IQR and medians, respectively. Whisker endpoints are equal to the minimum and maximum values. Circles denote each individual animal. Statistical analysis was performed using non-parametric Kruskal-Wallis test with Dunn’s multiple comparisons. ***P* < 0.01, ****P* < 0.001, *****P* < 0.0001

**a**

**b**

**Immunogen:**

**a**

**Antigen:**

**b**

**Supplementary Fig. 5: Nanoparticle assembly restricts access to S2 and targets S1 domain of spike.**

**a-b** Mice were immunized once with 10 µg of MERS_S-2P or MERS_dn5 and bled at week 3. Sera was tested for antibody binding to MERS_S-2P and MERS_SS. Boxes and horizontal bars denote the IQR and medians, respectively. Whisker endpoints are equal to the minimum and maximum values. Circles denote each individual animal. Statistical analysis was performed using non-parametric Kruskal-Wallis test with Dunn’s multiple comparisons. ***P* < 0.01, ****P* < 0.001, *****P* < 0.0001.

**b**

**a**

**c**

**d**

**Supplementary Fig. 6: Design and characterization of CoV-S2-P displayed on I53-dn5.**

**a** Computer-generated models of prefusion-stabilized spike trimers (S-2P) from HKU1 and OC43 and their homotypic display on I53-dn5 nanoparticle. Icosahedral nanocage displays 20 trimers. **b** Trace profiles of S-2P-dn5b trimer and -dn5 nanocage purification by size exclusion chromatography. **c** Representative images of CoV-S-2P_dn5 at 50,000-57,000x magnification and 2D class averages. Scale bars correspond to 100 nm (representative images) and 20 nm (2D class averages).

**Supplementary Fig. 7:   dn5 elicits broadly cross-reactive antibodies from diverse CoV-spikes.**

**a** Groups of 5 C57BL/6 female mice were immunized twice at weeks 0 and 3 with 10 µg of SARS-1_dn5, SARS-2_dn5, MERS_dn5, HKU1_dn5, or OC43_dn5 nanoparticles and bled at week 5. Control mice were immunized with H1_dn5. **a-f** Sera was screened by ELISA for antibody binding to MERS_S-2P, SARS-2_S-2P, SARS-1_S-2P, HKU1_S-2P, OC43_S-2P, 229E_S-2P, and NL63_S-2P. Boxes and horizontal bars denote the IQR and medians, respectively. Whisker endpoints are equal to the minimum and maximum values. Circles denote each individual animal.

**Immunogen:**

**a**

**b**

**c**

**d**

**e**

**f**

**Antigen:**
